# Supplementary figures and images for: Effects of Combining a Ketogenic Diet with Resistance Training on Body Composition, Strength, and Mechanical Power in Trained Individuals: A Narrative Review
Source: MDPI journal article supplement (doi:10.3390/nu13093083), 2021-09-01

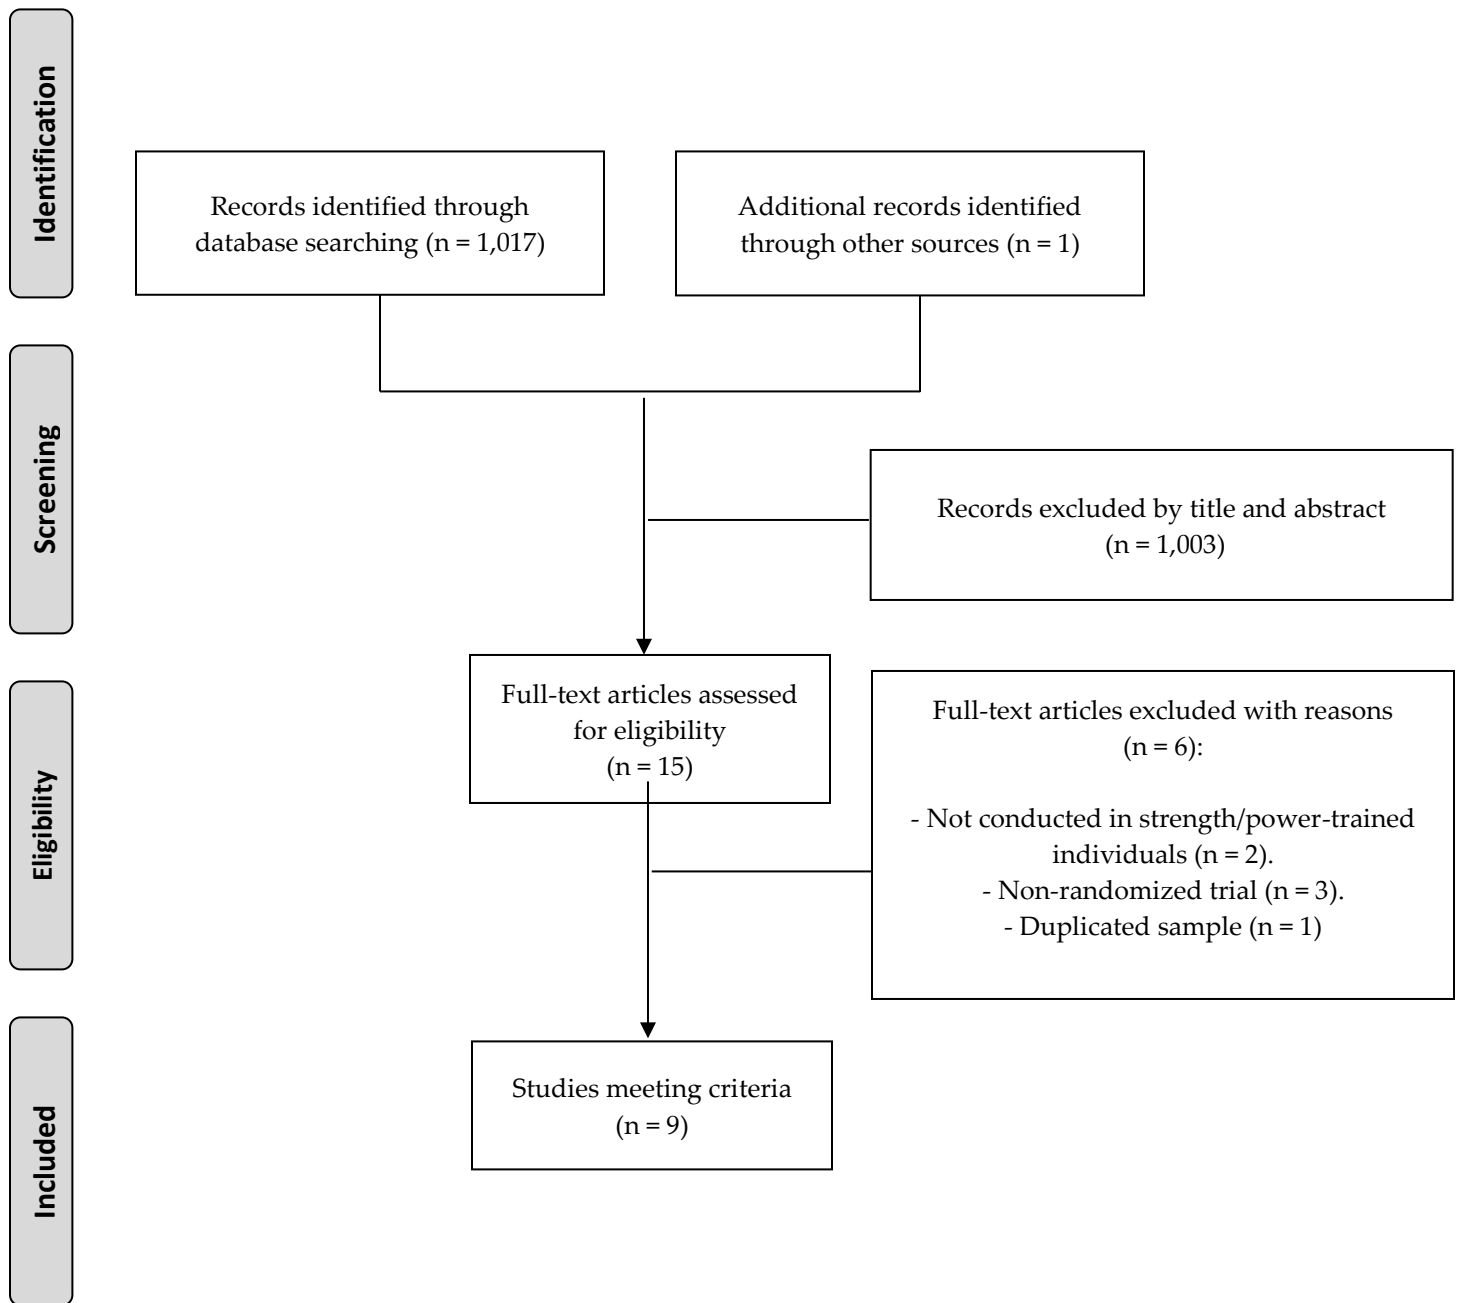

Supplement: s1 [file s1]
